# Supplementary material for: Population Study of Ovarian Cancer Risk Prediction for Targeted Screening and Prevention
Source: MDPI journal article supplement (doi:10.3390/cancers12051241), 2020-05-15
Supplement: s1 [file s1]

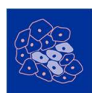

# Population Study of Ovarian Cancer Risk Prediction for Targeted Screening and Prevention

Faiza Gaba, Oleg Blyuss, Xinting Liu, Shivam Goyal, Nishant Lahoti, Dhivya Chandrasekaran, Margarida Kurzer, Jatinderpal Kalsi, Saskia Sanderson, Anne Lanceley, Munaza Ahmed, Lucy Side, Aleksandra Gentry-Maharaj, Yvonne Wallis, Andrew Wallace, Jo Waller, Craig Luccarini, Xin Yang, Joe Dennis, Alison Dunning, Andrew Lee, Antonis C. Antoniou, Rosa Legood, Usha Menon, Ian Jacobs and Ranjit Manchanda

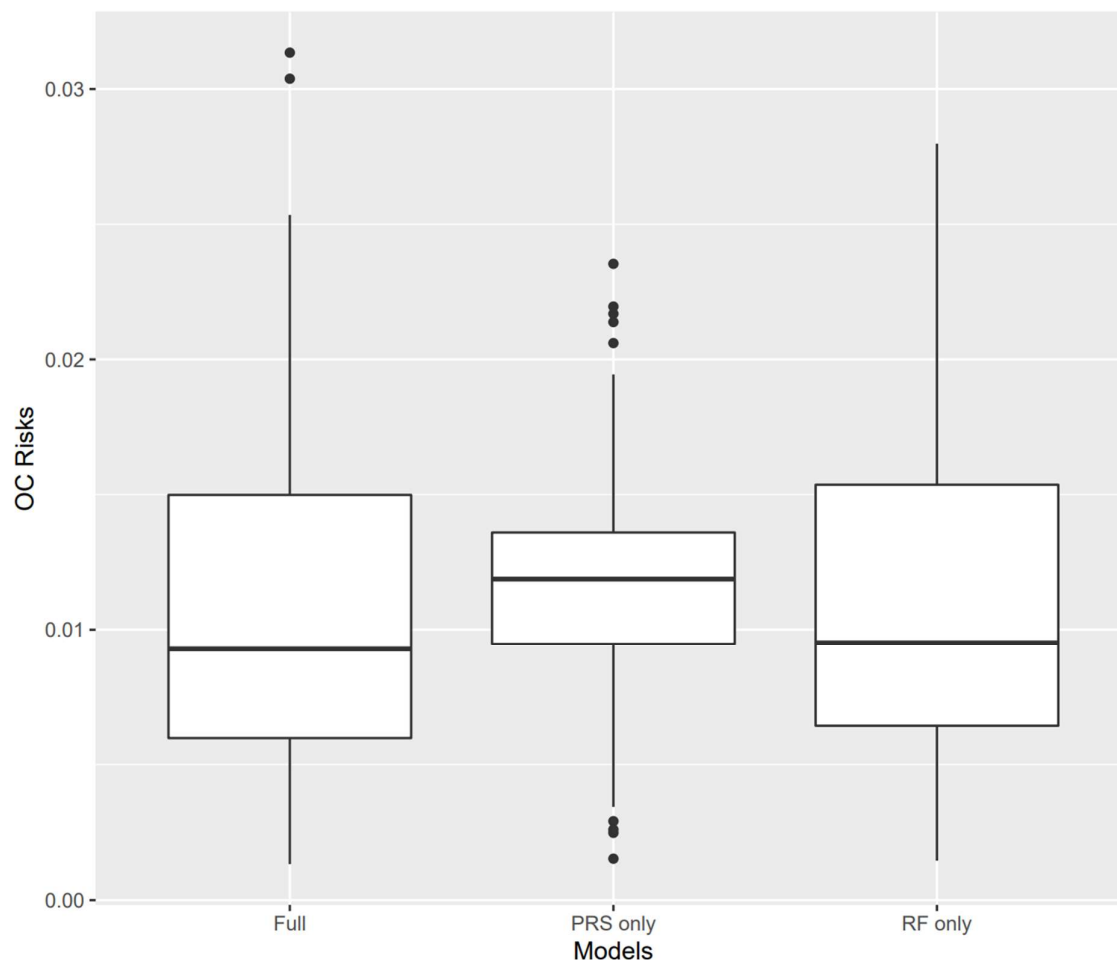

**Figure S1.** Distributions of the remaining lifetime ovarian cancer risks given by different model versions. Model predictions after excluding the identified *BRCA1* mutation carrier and always considering family history information and that women do not carry a rare pathogenic ovarian cancer susceptibility variant. Models considered: Full – predictions under the full model; Polygenic Risk Scores (PRS) only – predictions considering the PRS only; Risk Factors (RF)- predictions considering only the epidemiological risk factors.

**Table S1.** Perceived benefits, risks, limitations or panel genetic testing/ovarian cancer risk assessment measured at baseline.

|                                                                                                                            | Not at all important |        | Somewhat important |        | Very important |        | Does not apply |        |
|----------------------------------------------------------------------------------------------------------------------------|----------------------|--------|--------------------|--------|----------------|--------|----------------|--------|
|                                                                                                                            | %                    | N      | %                  | N      | %              | N      | %              | N      |
| <b>Benefits</b>                                                                                                            |                      |        |                    |        |                |        |                |        |
| To be reassured                                                                                                            | 4.9                  | 5/102  | 46.08              | 47/102 | 48.04          | 49/102 | 0.98           | 1/102  |
| To enhance cancer prevention                                                                                               | 1.96                 | 2/102  | 16.67              | 17/102 | 80.39          | 82/102 | 0.98           | 1/102  |
| To learn about my children's risk.                                                                                         | 3.92                 | 4/102  | 15.69              | 16/102 | 54.95          | 56/102 | 25.49          | 26/102 |
| To make a decision about surgery to have my ovaries and tubes removed before cancer arises.                                | 13.27                | 13/98  | 32.65              | 32/98  | 44.90          | 44/98  | 9.18           | 9/98   |
| To benefit research or improve the health of other women                                                                   | 1.01                 | 1/99   | 17.17              | 17/99  | 80.81          | 80/99  | 1.01           | 1/99   |
| To make childbearing decisions                                                                                             | 20.62                | 20/97  | 10.31              | 10/97  | 14.43          | 14/97  | 54.64          | 53/97  |
| To know if I need to get cancer screening tests more often.                                                                | 8                    | 8/100  | 28                 | 28/100 | 61             | 61/100 | 3              | 3/100  |
| To reduce uncertainty                                                                                                      | 11.11                | 11/99  | 38.38              | 38/99  | 49.49          | 49/99  | 1.01           | 1/99   |
| <b>Risks/limitations</b>                                                                                                   |                      |        |                    |        |                |        |                |        |
| I am worried about losing my insurance.                                                                                    | 49                   | 49/100 | 19                 | 19/100 | 9              | 9/100  | 23             | 23/100 |
| I am worried about loss of confidentiality.                                                                                | 67.33                | 68/101 | 18.81              | 19/101 | 5.94           | 6/101  | 7.92           | 8/101  |
| I am worried about stigmatization.                                                                                         | 85                   | 85/100 | 7                  | 7/100  | 2              | 2/100  | 6              | 6/100  |
| I do not trust modern medicine.                                                                                            | 74.75                | 74/99  | 5.05               | 5/99   | 2.02           | 2/99   | 18.18          | 18/99  |
| I believe that there is nothing that can be done to prevent getting cancer.                                                | 62.63                | 62/99  | 9.09               | 9/99   | 6.06           | 6/99   | 22.22          | 22/99  |
| I am concerned about the effect it would have on my family.                                                                | 34.65                | 35/101 | 40.59              | 41/101 | 15.84          | 16/101 | 8.91           | 9/101  |
| I am concerned that I could not handle it emotionally.                                                                     | 50.50                | 51/101 | 30.69              | 31/101 | 6.93           | 7/101  | 11.88          | 12/101 |
| I am concerned that genetic information from the test might be used to single out individuals of a particular ethnic group | 76.77                | 76/99  | 9.09               | 9/99   | 2.02           | 2/99   | 12.12          | 12/99  |

**Table S2.** Decision aid question responses for women who consented and who did not consent to the study.

| Decision aid questions                                          | Responses to individual questions |       |                          |        |                                           |        |                                 |      |                          |       |                                           |      | p-value<br>(Fisher's exact test) |
|-----------------------------------------------------------------|-----------------------------------|-------|--------------------------|--------|-------------------------------------------|--------|---------------------------------|------|--------------------------|-------|-------------------------------------------|------|----------------------------------|
|                                                                 | Individuals who consented         |       |                          |        |                                           |        | Individuals who did not consent |      |                          |       |                                           |      |                                  |
|                                                                 | Against taking part               |       | In favour of taking part |        | Neither in favour nor against taking part |        | Against taking part             |      | In favour of taking part |       | Neither in favour nor against taking part |      |                                  |
|                                                                 |                                   |       |                          |        |                                           |        |                                 |      |                          |       |                                           |      |                                  |
| %                                                               | N                                 | %     | N                        | %      | N                                         | %      | N                               | %    | N                        | %     | N                                         |      |                                  |
| My current worries about ovarian cancer make me feel...         | 0                                 | 0/103 | 83.5                     | 86/103 | 16.5                                      | 17/103 | 0                               | 0/20 | 75                       | 15/20 | 25                                        | 5/20 | 0.353                            |
| Having genetic testing as part of this programme makes me feel. | 0                                 | 0/103 | 93.2                     | 96/103 | 6.8                                       | 7/103  | 0                               | 0/20 | 95                       | 19/20 | 5                                         | 1/20 | 1                                |

|                                                                                                                                                                                                     |                 |        |              |         |               |        |                 |      |              |       |               |      |       |
|-----------------------------------------------------------------------------------------------------------------------------------------------------------------------------------------------------|-----------------|--------|--------------|---------|---------------|--------|-----------------|------|--------------|-------|---------------|------|-------|
| The possibility of learning about my risk of ovarian cancer as part of this study makes me feel...                                                                                                  | 0.97            | 1/103  | 95.15        | 98/103  | 3.88          | 4/103  | 0               | 0/20 | 95           | 19/20 | 5             | 1/20 | 1     |
| Although most women will be reassured that they are at low risk for ovarian cancer as part of participating in this programme, some women may learn that they are at high risk. This makes me feel. | 1.94            | 2/103  | 88.35        | 91/103  | 9.71          | 10/103 | 0               | 0/20 | 80           | 16/20 | 20            | 4/20 | 0.472 |
| The possibility of learning genetic information that may be important for my family members makes me feel.                                                                                          | 0               | 0/103  | 94.17        | 97/103  | 5.83          | 6/103  | 0               | 0/20 | 95           | 19/20 | 5             | 1/20 | 1     |
| The benefits of taking part in this programme make me feel.                                                                                                                                         | 0               | 0/103  | 98.06        | 101/103 | 1.94          | 2/103  | 0               | 0/20 | 95           | 19/20 | 5             | 1/20 | 0.38  |
| The risks of taking part in this programme make me feel.                                                                                                                                            | 3.88            | 4/103  | 64.08        | 66/103  | 32.04         | 33/103 | 0               | 0/20 | 60           | 12/20 | 40            | 8/20 | 0.81  |
| My fears/worries/concerns about screening make me feel.                                                                                                                                             | 0.97            | 1/103  | 67.96        | 70/103  | 31.07         | 32/103 | 5               | 1/20 | 65           | 13/20 | 30            | 6/20 | 0.432 |
| My fears/worries/concerns about the possibility of having surgery to remove my ovaries make me feel.                                                                                                | 9.71            | 10/103 | 63.11        | 65/103  | 27.18         | 28/103 | 20              | 4/20 | 55           | 11/20 | 25            | 5/20 | 0.388 |
| If I decide not to take part, I may regret my decision if I develop ovarian cancer in the future                                                                                                    | <b>Disagree</b> |        | <b>Agree</b> |         | <b>Unsure</b> |        | <b>Disagree</b> |      | <b>Agree</b> |       | <b>Unsure</b> |      |       |
|                                                                                                                                                                                                     | %               | N      | %            | N       | %             | N      | %               | N    | %            | N     | %             | N    |       |
|                                                                                                                                                                                                     | 9.71            | 10/103 | 88.35        | 91/103  | 1.94          | 2/103  | 10              | 2/20 | 75           | 15/20 | 15            | 3/20 | 0.036 |
| <b>Mean of total scores *</b>                                                                                                                                                                       | 8.1             |        |              |         | 7.4           |        |                 |      | 0.14 **      |       |               |      |       |

23/123 individuals viewed the decision aid more than once. For these 23 cases, the responses to the first view are included in this table. \* The responses to the individual decision aid questions were scored accordingly: 1 = in favour of taking part, -1 = against taking part, 0 = neither in favour or against taking part, 1 = agree, -1 = disagree, 0 = unsure. Women with total scores between -10 and -1 were considered to be "leaning-against taking part"; scores between 0 and 5 "undecided"; and scores between 6 and 10 "leaning-towards taking part". \*\* Wilcoxon rank-sum test.

**Table S3.** Mean scores at repeat viewings for participants who viewed the decision aid on multiple occasions.

| DA viewing attempt      | Number of participants viewing DA on multiple occasions according to number of attempts (N) | Mean score (SD, range) at each attempt |
|-------------------------|---------------------------------------------------------------------------------------------|----------------------------------------|
| 1 <sup>st</sup> attempt | 23                                                                                          | 7.739 (SD = 2.378, range 3–10)         |
| 2 <sup>nd</sup> attempt | 23                                                                                          | 8.348 (SD = 2.058, range 2–10)         |
| 3 <sup>rd</sup> attempt | 17                                                                                          | 8.588 (SD = 1.906, range 4–10)         |
| 4 <sup>th</sup> attempt | 13                                                                                          | 7.846 (SD = 1.819, range 4–10)         |
| 5 <sup>th</sup> attempt | 6                                                                                           | 8 (SD = 2.449, range 4–10)             |
| 6 <sup>th</sup> attempt | 3                                                                                           | 9 (SD = 1.732, range 7–10)             |
| 7 <sup>th</sup> attempt | 1                                                                                           | 10                                     |

DA – decision aid; SD – standard deviation. 23/123 individuals viewed the decision aid on more than one occasion. This table depicts the mean scores of these 23 individuals at baseline (first attempt) and at repeat viewing attempts.

**Table S4.** Linear random-effects mixed models for trends in decision aid scores in participants viewing the decision aid on multiple occasions.

| Mixed models for trends  | Coef. | Std. Err | $p >  z $ | 95% CI          |
|--------------------------|-------|----------|-----------|-----------------|
| BL attempt vs. attempt 2 | 0.609 | 0.273    | 0.03      | 0.054 to 1.111  |
| BL attempt vs. attempt 3 | 0.68  | 0.305    | 0.03      | −0.002 to 1.294 |
| BL attempt vs. attempt 4 | 0.356 | 0        | 0.295     | −0.331 to 0.939 |
| BL attempt vs. attempt 5 | 0.715 | 0.456    | 0.123     | −0.183 to 1.599 |
| BL attempt vs. attempt 6 | 0.701 | 0.615    | 0.259     | −0.535 to 1.936 |
| BL attempt vs. attempt 7 | 0.584 | 1.019    | 0.569     | −1.308 to 2.655 |

BL – baseline; Coef. – coefficient; Std. Err – standard error; Univariate analysis comparing mean decision aid scores at baseline (first attempt) to repeat attempts for the 23/123 individuals who viewed the decision aid on multiple occasions.
